# Supplementary material for: C-type cytochrome-initiated reduction of bacterial lytic polysaccharide monooxygenases
Source: Oxford University Press journal article supplement (doi:10.1042/bcj20210376), 2021-07-09
Supplement: bcj-2021-0376_supp.pdf [file bcj-2021-0376_supp.pdf]

# Supporting Information for

## Supplementary Notes

As described previously (1), reversible, non-catalytic electron transfer film voltammetry signals such as those recorded for CjX183 (solid black line, Figure S1) can be analyzed by first fitting a polynomial baseline to the voltammogram (red line, Figure S1) and then subtracting this baseline to generate an “extracted signal” of the isolated Faradaic peak current, free from background non-Faradaic capacitive current contributions (dashed black line, Figure S1). A version of the Nernst equation (2) (Equation S1), can then be used to simulate the extracted signal.

$$i = \pm \frac{n_s n_{app} F^2 v A \Gamma}{RT} \frac{\exp\{n_{app} F (E - E^0) / RT\}}{[1 + \exp\{n_{app} F (E - E^0) / RT\}]^2} \quad \text{Equation S1}$$

The known parameters in Equation S1 are F, the Faraday constant; v, the experimental scan rate; A, the area of the electrode; R, the molar gas constant; T, temperature; and E, applied potential. Table S2 reports the parameters which have been chosen to generate the “simulated signal” data plotted in Figure S1. The “cathodic” values refer to those used to fit the reductive process (negative current peak), while “anodic” values refer to those used to fit the oxidative process (positive current peak). The values of  $n_s$ , the number of electrons in the reaction, and  $n_{app}$ , the apparent number of electrons, show that the experimental data for CjX183 is well modelled by a one electron reaction. Averaging the two peak potential values ( $E^0$  in the equation) yields the midpoint potential,  $E_{(O/R)}^f / V$  vs SHE, as reported in main paper. The coverage of protein on the electrode,  $\Gamma$ , is consistent with a sub-monolayer coating of CjX183.

**Table S1. CjX183 Data collection and refinement statistics**

|                                     | <b>CjX183</b>                  |
|-------------------------------------|--------------------------------|
| <b>Data collection</b>              |                                |
| Space group                         | P2 <sub>1</sub> 2 <sub>1</sub> |
| Cell dimensions                     |                                |
| $a, b, c$ (Å)                       | 28.51, 55.38, 55.86            |
| $\alpha, \beta, \gamma$ (°)         | 90.0, 90.0, 90.0               |
| Resolution (Å)                      | 55.85-1.20 (1.22-1.20)         |
| $R_{\text{merge}}$                  | 0.05 (0.088)                   |
| $R_{\text{pim}}$                    | 0.033 (0.057)                  |
| $CC(1/2)$                           | 0.997 (0.990)                  |
| $I / \sigma I$                      | 48.3 (21.7)                    |
| Completeness (%)                    | 100 (99.6)                     |
| Redundancy                          | 6 (6)                          |
| <b>Refinement</b>                   |                                |
| Resolution (Å)                      | 39.36-1.20                     |
| No. reflections                     | 28390/1404                     |
| $R_{\text{work}} / R_{\text{free}}$ | 0.112/0.128                    |
| $B$ -factors (Å <sup>2</sup> )      |                                |
| Protein (1388 atoms)                | 11.8                           |
| Ligand (73 atoms)                   | 6.8                            |
| Ion/solvent (19 atoms)              | 22.2                           |
| Water (117 atoms)                   | 23.5                           |
| R.m.s. deviations                   |                                |
| Bond lengths (Å)                    | 0.022                          |
| Bond angles (°)                     | 1.945                          |
| PDB ID                              | 7B21                           |

\*Values in parentheses are for highest-resolution shell.

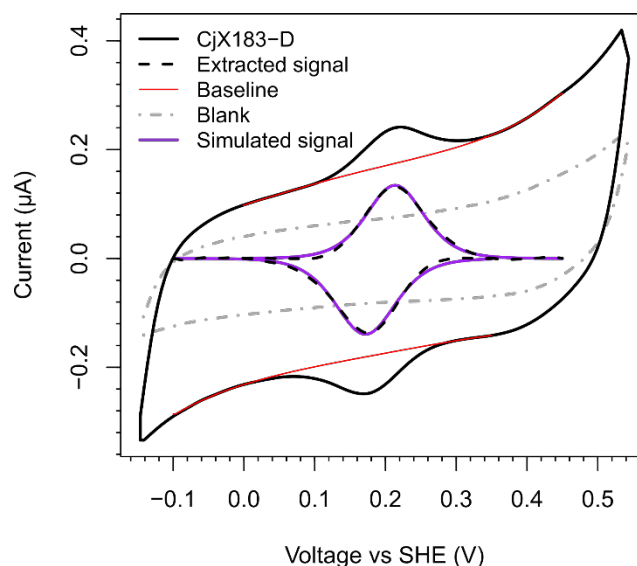

**Figure S1. Cyclic voltammetry of CjX183.**  $30 \text{ mV s}^{-1}$  cyclic voltammetry of a protein film of CjX183 adsorbed onto a pyrolytic graphite edge working electrode (solid black line) and the corresponding control “blank” experiment where a protein-free working electrode (gray dashed line) is measured under the same experimental conditions of pH 7.0 aqueous buffer (50 mM sodium phosphate, 150 mM NaCl), 5 °C,  $\text{N}_2$  atmosphere, Pt counter electrode and calomel (saturated KCl) reference electrode (a correction factor has been applied to report potentials versus SHE). The extracted signal (black dashed line), baseline (solid red line) and simulated signal (solid purple line) relate to the analysis of the data.

**Table S2** Parameters used to generate the “simulated signal” data plotted in Figure S1.

| <b>Parameter</b>                          | <b>Value</b> |
|-------------------------------------------|--------------|
| $A / \text{cm}^2$                         | 0.03         |
| $n_s$ cathodic                            | 1            |
| $n_s$ anodic                              | 1            |
| $n_{app}$ cathodic                        | 0.835        |
| $n_{app}$ anodic                          | 0.872        |
| Anodic peak potential / mV vs SHE         | 214          |
| Cathodic peak potential / mV vs SHE       | 171          |
| $E_{(O/R)}^f / \text{V vs SHE}$           | 193          |
| $\Gamma$ cathodic / pmol $\text{cm}^{-2}$ | 87           |
| $\Gamma$ anodic / pmol $\text{cm}^{-2}$   | 80           |

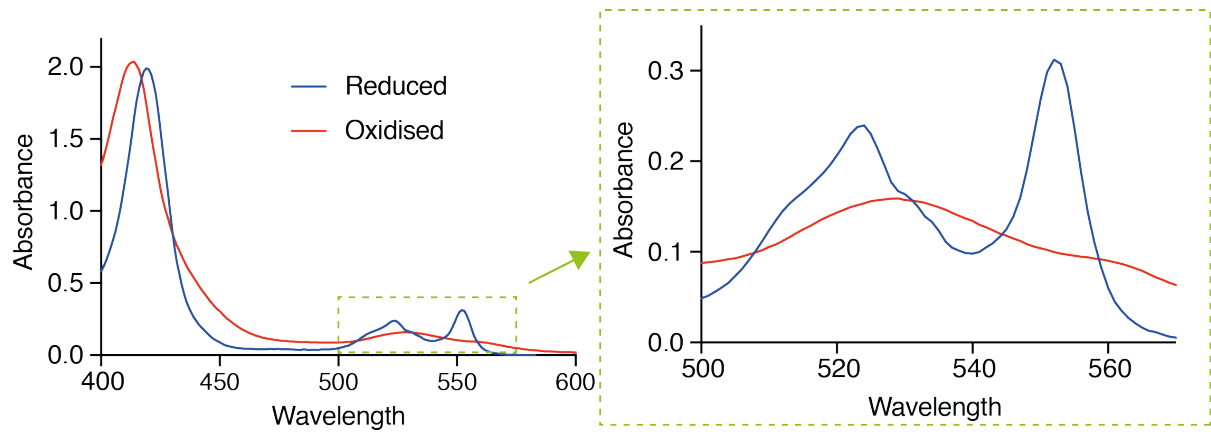

**Figure S2: UV-Vis spectrum of CjX183 between 400 and 600nm.** The Soret band shifts from 413 nm to 419 nm upon reduction. In the 500-570 nm region, expanded in the right panel, the  $\alpha$  and  $\beta$  bands, indicative of the reduced cytochrome, have absorption maxima at 523 nm and 552 nm, in the oxidised protein they form a broad peak.

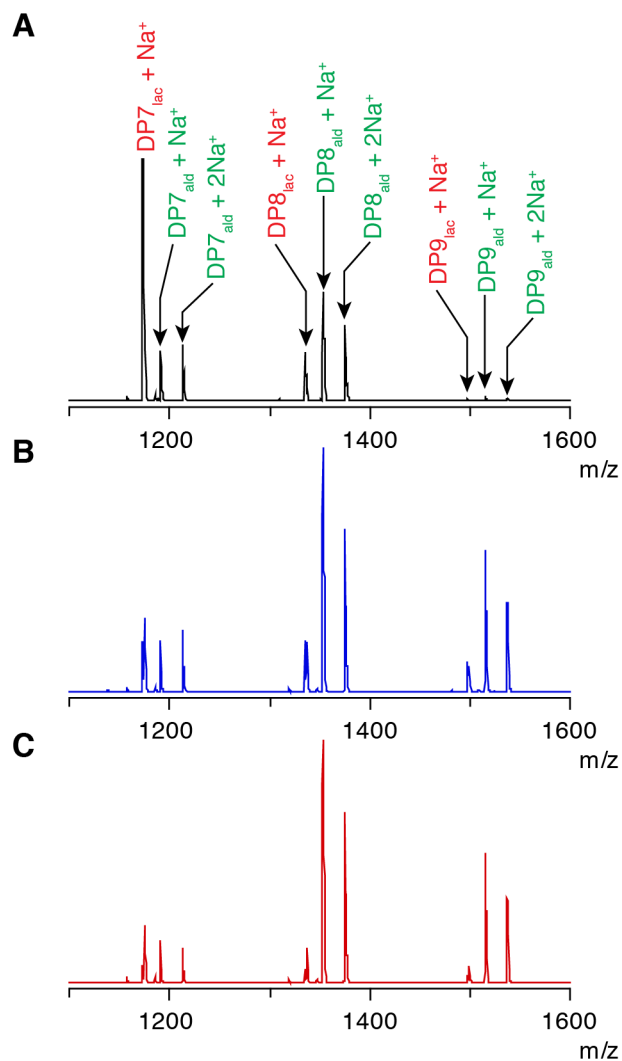

**Figure S3. MALDI analysis of CjAA10 activity on PASC.** The oxidised oligosaccharide products liberated are shown for activity using **(A)** ascorbate as the reducing agent; **(B)** chemically reduced CjX183 as the activator; and **(C)** electrochemically reduced CjX183 as the activator.

**Table S3. Catalytic parameters calculated from the Amplex Red H<sub>2</sub>O<sub>2</sub> assay.**

|                                                    | $K_m$ ( $\mu\text{M}$ ) | $V_{\text{max}}$ ( $\mu\text{M min}^{-1}$ ) | $k_{\text{obs}}$ ( $\text{min}^{-1}$ ) | $K_{\text{obs}}/K_m$ ( $\mu\text{M}^{-1} \text{min}^{-1}$ ) |
|----------------------------------------------------|-------------------------|---------------------------------------------|----------------------------------------|-------------------------------------------------------------|
| <i>CjAA10B</i> $\Delta$ <i>CBM</i> + <i>CjX183</i> | $0.78 \pm 0.18$         | $0.028 \pm 0.002$                           | 0.014                                  | 0.018                                                       |
| <i>CjAA10B</i> $\Delta$ <i>CBM</i> + ascorbate     | $5.8 \pm 0.3$           | $0.049 \pm 0.001$                           | 0.025                                  | 0.0042                                                      |
| <i>CfAA10</i> + <i>CjX183</i>                      | $5.7 \pm 1.2$           | $0.009 \pm 0.006$                           | 0.004                                  | 0.00075                                                     |
| <i>CjAA10</i> + ascorbate                          | $19.2 \pm 1.2$          | $0.111 \pm 0.003$                           | 0.055                                  | 0.0029                                                      |

## Supplementary References

1. Yates, N. D., Dowsett, M. R., Bentley, P., Dickenson-Fogg, J. A., Pratt, A., Blanford, C. F., Fascione, M. A., and Parkin, A. (2020) Aldehyde-Mediated Protein-to-Surface Tethering via Controlled Diazonium Electrode Functionalization Using Protected Hydroxylamines. *Langmuir* **36**, 5654-5664
2. Heering, H. A., Weiner, J. H., and Armstrong, F. A. (1997) Direct Detection and Measurement of Electron Relays in a Multicentered Enzyme: Voltammetry of Electrode-Surface Films of *E. coli* Fumarate Reductase, an Iron–Sulfur Flavoprotein. *Journal of the American Chemical Society* **119**, 11628-11638
